# Supplementary material for: Au–Pd NPs immobilised on nanostructured ceria and titania: impact of support morphology on the catalytic activity for selective oxidation
Source: Royal Society of Chemistry journal article supplement (doi:10.1039/c7cy02329d), 2018-01-01
Supplement: c7cy02329d1.pdf [file c7cy02329d1.pdf]

*Electronic Supplementary Information (ESI)*

**Au-Pd NPs immobilised on nanostructured ceria and titania:  
impact of support morphology on the catalytic activity for  
selective oxidation**

Motaz Khawaji, and David Chadwick\*

Department of Chemical Engineering, Imperial College London, Exhibition Road, London  
SW7 2AZ, UK

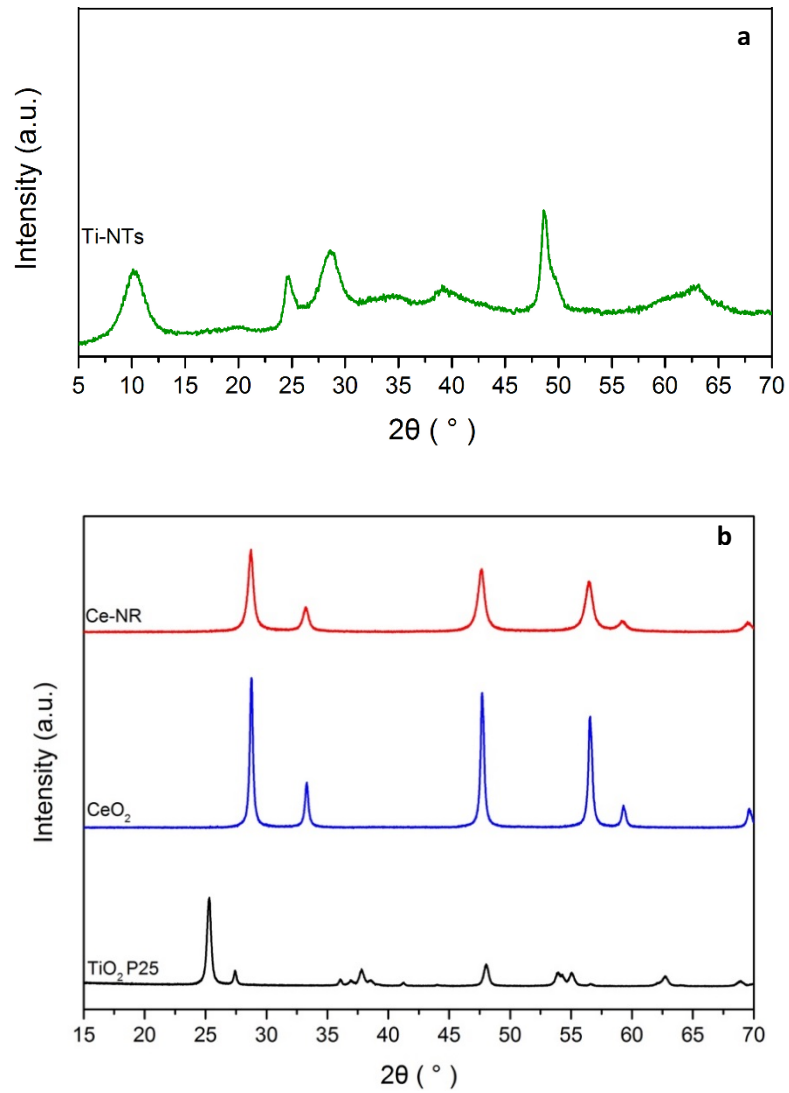

**Figure S1.** X-ray powder diffraction patterns of Ti-NTs (a) and Ce-NRs, CeO<sub>2</sub> and TiO<sub>2</sub> P25 nanopowders (b).

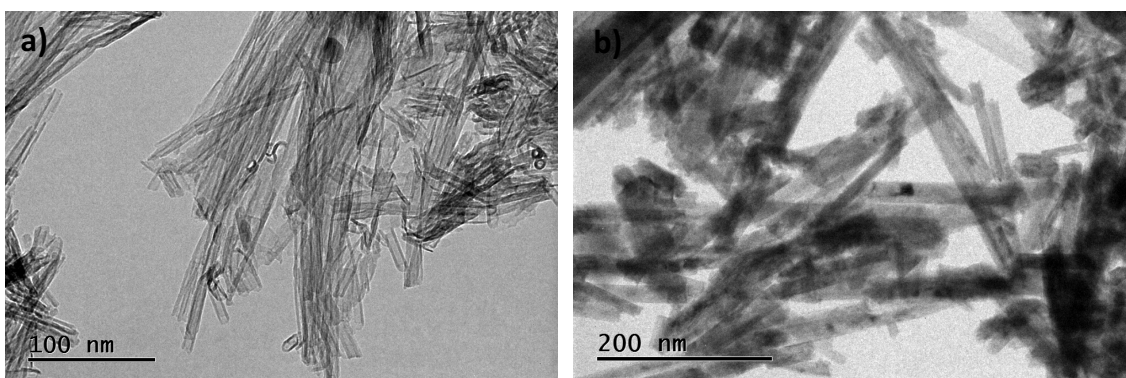

**Figure S2.** TEM images of a) Ti-NTs, and b) Ce-NRs.

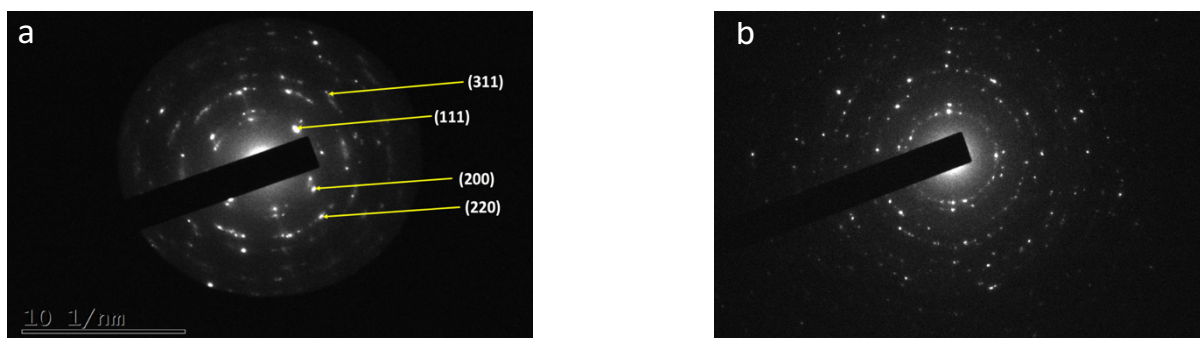

**Figure S3.** Selected area electron diffraction (SAED) patterns for (a) Ce-NR and (b) CeO<sub>2</sub> obtained with the JEOL JEM-2100F. The ring patterns confirm the polycrystalline nature of the as-Ce-NR and CeO<sub>2</sub> nanopowder. The rings are indexed against the CeO<sub>2</sub> fluorite structure.

**Table S1.** Textural properties determined from N<sub>2</sub> adsorption-desorption measurements.

| Support | SBET (m <sup>2</sup> /g) | Pore volume (cm <sup>3</sup> /g) | Pore diameter (nm) |
|---------|--------------------------|----------------------------------|--------------------|
| Ti-NT   | 236                      | 0.51                             | 7.7                |
| Ce-NR   | 61.7                     | 0.34                             | 17.3               |

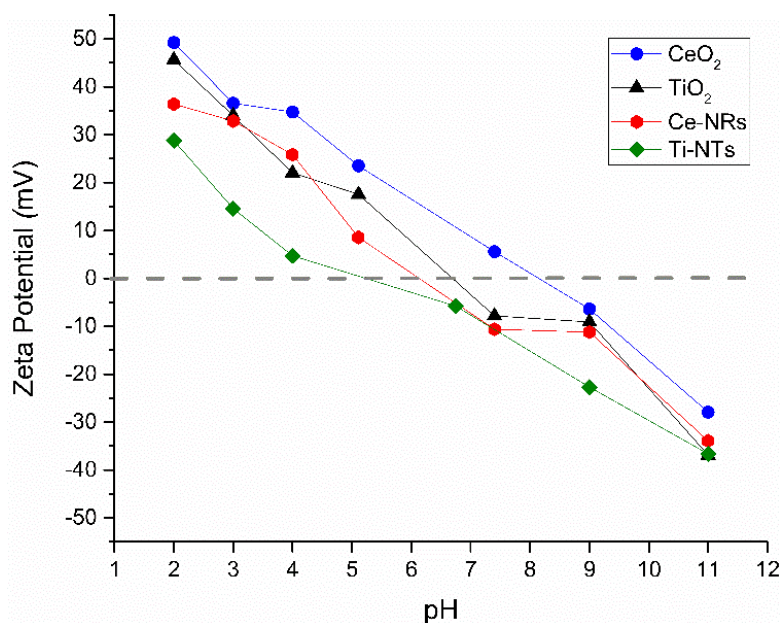

**Figure S4.** Zeta potential as a function of pH for Ce-NRs, CeO<sub>2</sub> nanopowders, Ti-NTs, and TiO<sub>2</sub> P25.

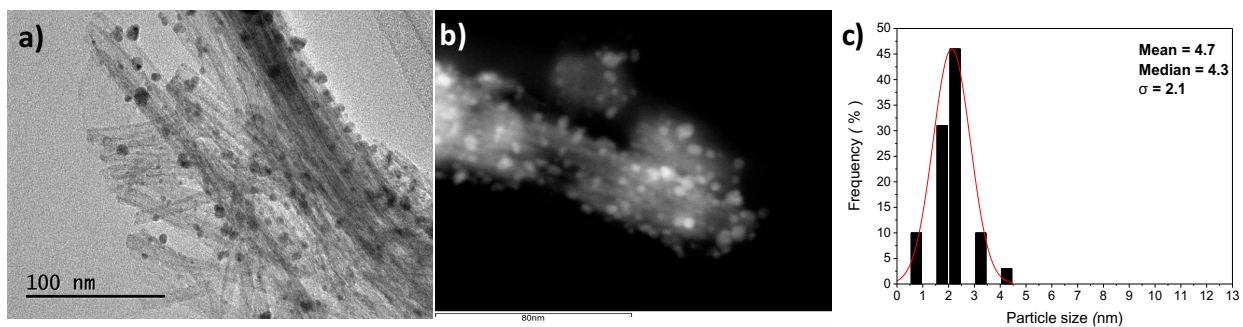

**Figure S5.** a) TEM image, b) STEM image for Au-Pd/Ti-NT, and c) corresponding particle size distribution.

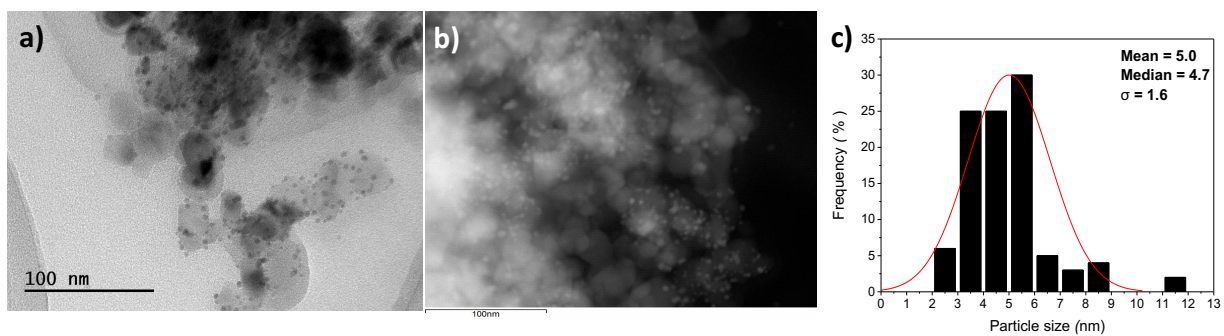

**Figure S6.** a) TEM image, b) STEM image for Au-Pd/TiO<sub>2</sub>, and c) corresponding particle size distribution.

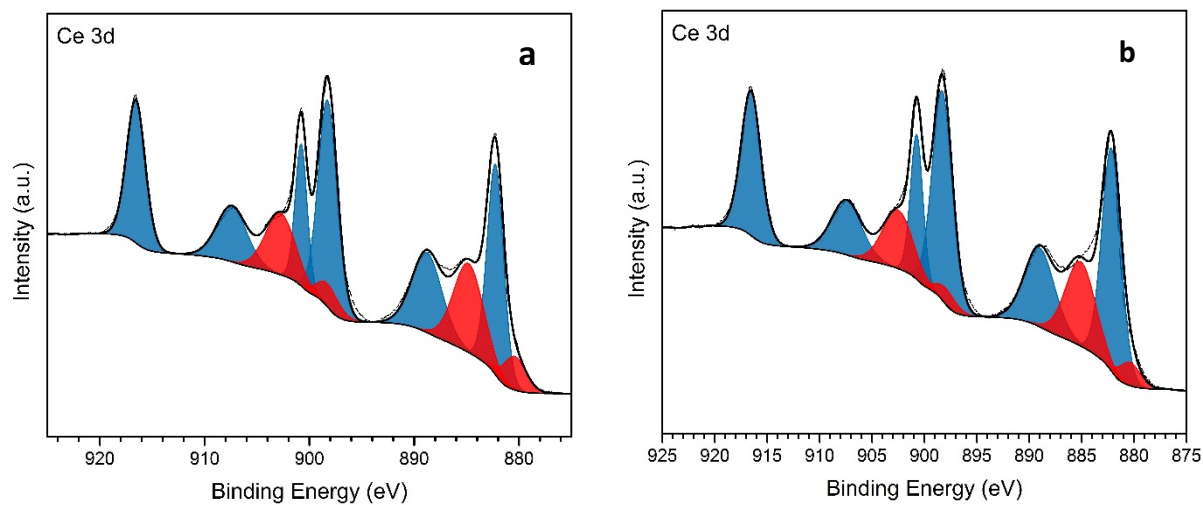

**Figure S7.** XPS spectra of Ce 3d for (a) Ce-NR and (b) CeO<sub>2</sub> nanopowder.

**Table S2.** Concentration of Ce<sup>3+</sup> and O species for the ceria supports from XPS.

| Support          | Ce <sup>3+</sup> (at.%) <sup>a</sup> | O <sub>α</sub> (at.%) <sup>b</sup> | O <sub>β</sub> (at.%) <sup>b</sup> | O <sub>γ</sub> (at.%) <sup>b</sup> |
|------------------|--------------------------------------|------------------------------------|------------------------------------|------------------------------------|
| Ce-NR            | 31.0                                 | 61.7                               | 35.2                               | 3.0                                |
| CeO <sub>2</sub> | 27.3                                 | 77.5                               | 20.1                               | 2.2                                |

<sup>a</sup> Determined from the Ce 3d XPS spectra.

<sup>b</sup> Determined from the O1s XPS spectra.

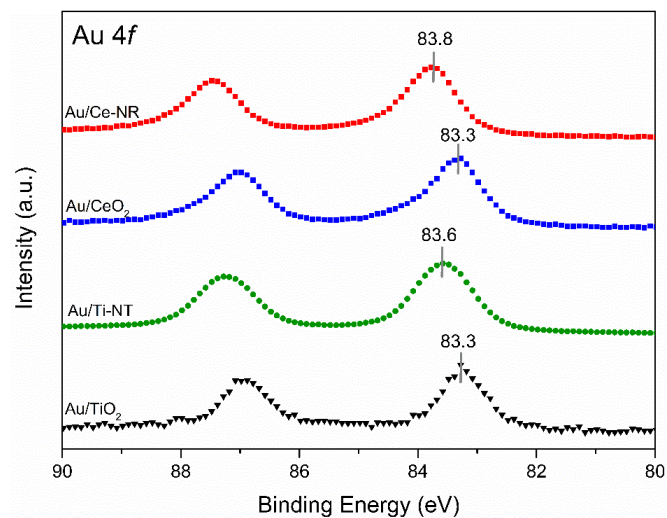

**Figure S8.** XPS spectra of Au 4f for monometallic catalyst samples Au/Ce-NR, Au/CeO<sub>2</sub>, Au /Ti-NT and Au-Pd/TiO<sub>2</sub>

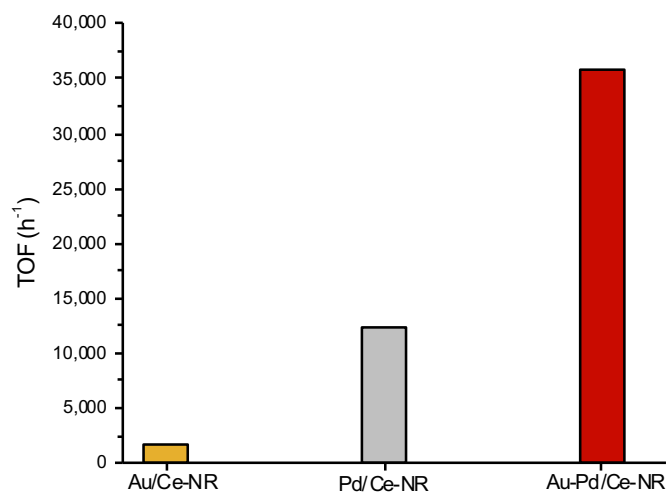

**Figure S9.** TOF (h<sup>-1</sup>) for monometallic and bimetallic catalysts prepared by sol-immobilisation. Reaction conditions: T= 120°C, pO<sub>2</sub>= 2 bar, stirring rate=1,000 rpm, molar ratio of benzyl alcohol/metal = 50,000. TOF calculated after 0.5 hour.
